# Supplementary material
Source: Springer Nature journal article supplement (https://www.springermedizin.de/resource/supplementary/12943_2009_399_MOESM2_ESM.pdf/9554176)

**A**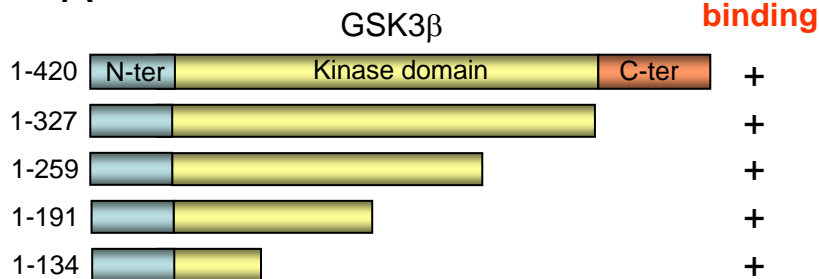**p53 binding**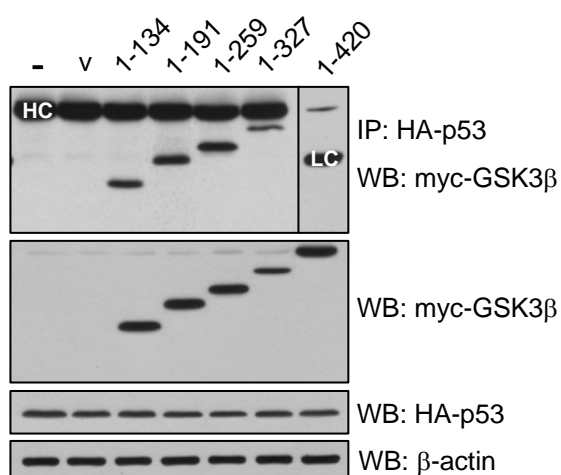**B**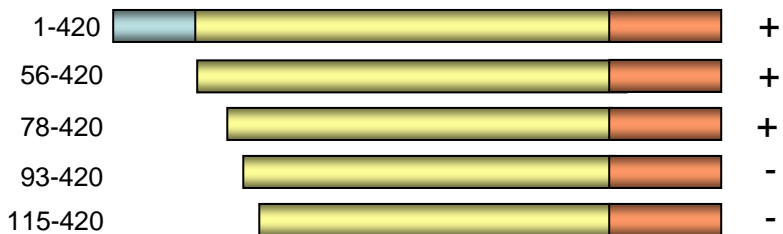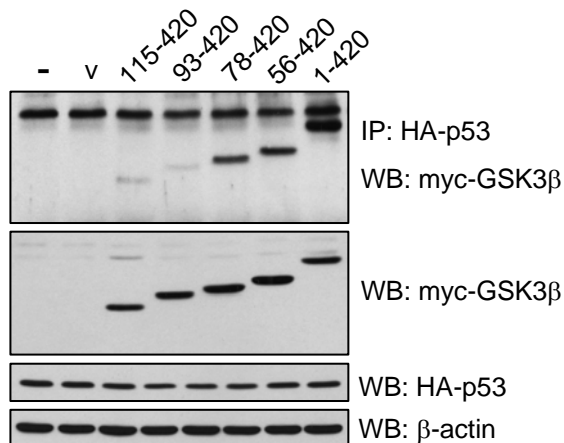**C**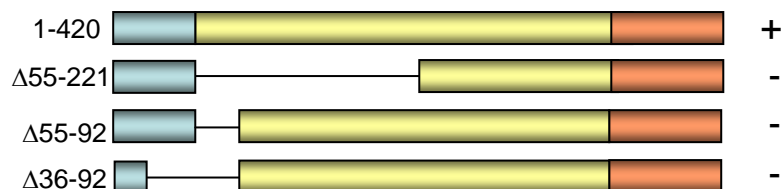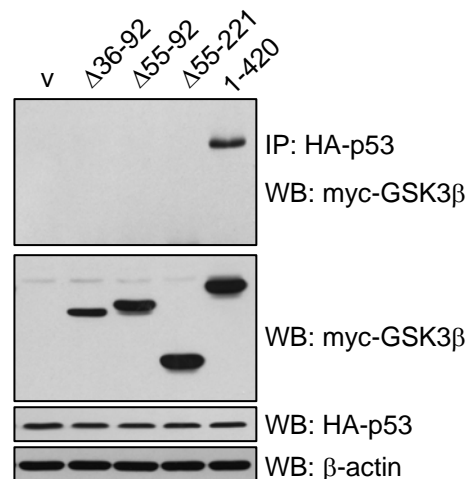

Supplement: MOESM2 [file 9554176]
